# Supplementary material
Source: MDPI journal article supplement (https://www.mdpi.com/2071-1050/14/21/14581)
Supplement: s1 [file s1 › sustainability-1946549-supplementary.pdf]

**Table S1.** Testing normality and homogeneity by group of variables (skills) based on coefficient of variation of the two analyzed groups (CV)

| Skills belonging to a group of global competences                        | Skills and abilities generally seen as <u>required</u> to develop global competences, as identified by students |         | Skills and abilities <u>developed</u> by the university for the <u>national labour market</u> , as identified by students |         | Skills and abilities <u>developed</u> by the university for the <u>international labour market</u> , as identified by students |         | Skills and abilities seen as <u>required in the employers'</u> recruitment process, as perceived by students. |         |
|--------------------------------------------------------------------------|-----------------------------------------------------------------------------------------------------------------|---------|---------------------------------------------------------------------------------------------------------------------------|---------|--------------------------------------------------------------------------------------------------------------------------------|---------|---------------------------------------------------------------------------------------------------------------|---------|
|                                                                          | Group 1                                                                                                         | Group 2 | Group 1                                                                                                                   | Group 2 | Group 1                                                                                                                        | Group 2 | Group 1                                                                                                       | Group 2 |
| <b>International competences:</b>                                        |                                                                                                                 |         |                                                                                                                           |         |                                                                                                                                |         |                                                                                                               |         |
| Efficient communication in work teams (S1)                               | 16.36%                                                                                                          | 13.05%  | 23.11%                                                                                                                    | 20.67%  | 25.39%                                                                                                                         | 23.32%  | 11.46%                                                                                                        | 16.12%  |
| Very good knowledge of English language (S2)                             | 10.11%                                                                                                          | 13.61%  | 19.20%                                                                                                                    | 19.23%  | 20.47%                                                                                                                         | 19.99%  | 11.03%                                                                                                        | 14.56%  |
| Very good knowledge of a second foreign language other than English (S3) | 21.92%                                                                                                          | 26.13%  | 30.62%                                                                                                                    | 30.35%  | 32.58%                                                                                                                         | 30.64%  | 19.84%                                                                                                        | 27.14%  |
| Knowledge of international political, economic and business context (S4) | 16.41%                                                                                                          | 16.11%  | 19.81%                                                                                                                    | 20.38%  | 22.85%                                                                                                                         | 20.85%  | 18.73%                                                                                                        | 21.98%  |
| Efficient work in multidisciplinary teams (S5)                           | 18.14%                                                                                                          | 18.41%  | 31.77%                                                                                                                    | 26.79%  | 33.93%                                                                                                                         | 26.49%  | 19.63%                                                                                                        | 18.60%  |
| Efficient work in multicultural teams (S6)                               | 21.27%                                                                                                          | 17.78%  | 35.95%                                                                                                                    | 36.06%  | 37.63%                                                                                                                         | 36.06%  | 18.38%                                                                                                        | 20.85%  |
| <b>Personal competences:</b>                                             |                                                                                                                 |         |                                                                                                                           |         |                                                                                                                                |         |                                                                                                               |         |
| Truthfulness (S7)                                                        | 17.73%                                                                                                          | 17.28%  | 26.92%                                                                                                                    | 23.93%  | 27.19%                                                                                                                         | 25.76%  | 18.51%                                                                                                        | 16.37%  |
| Flexibility (S8)                                                         | 13.01%                                                                                                          | 13.71%  | 25.52%                                                                                                                    | 23.19%  | 26.14%                                                                                                                         | 24.78%  | 15.13%                                                                                                        | 11.86%  |
| Initiative and involvement (S9)                                          | 16.98%                                                                                                          | 19.17%  | 25.23%                                                                                                                    | 22.99%  | 25.34%                                                                                                                         | 27.64%  | 14.77%                                                                                                        | 17.80%  |
| <b>Competences needed to develop the future career:</b>                  |                                                                                                                 |         |                                                                                                                           |         |                                                                                                                                |         |                                                                                                               |         |
| Accessing online/ offline information about employment                   | 21.18%                                                                                                          | 20.38%  | 32.07%                                                                                                                    | 29.42%  | 35.19%                                                                                                                         | 31.13%  | 19.44%                                                                                                        | 22.99%  |

|                                                                                               |        |        |        |        |        |        |        |        |
|-----------------------------------------------------------------------------------------------|--------|--------|--------|--------|--------|--------|--------|--------|
| opportunities (S10)                                                                           |        |        |        |        |        |        |        |        |
| Accessing the online platforms to find a job (S11)                                            | 19.86% | 24.93% | 35.40% | 38.11% | 37.34% | 38.01% | 17.29% | 24.28% |
| Providing the relevant information in a CV/ job interview (S12)                               | 20.85% | 20.82% | 37.31% | 42.46% | 37.66% | 41.51% | 16.42% | 16.28% |
| <b>Competences needed at workplace:</b>                                                       |        |        |        |        |        |        |        |        |
| Efficiency in scheduling the activity (S13)                                                   | 19.11% | 19.14% | 26.74% | 29.53% | 27.93% | 27.92% | 14.29% | 18.42% |
| Efficiency in organizing the activity (S14)                                                   | 14.95% | 17.08% | 25.39% | 27.82% | 28.83% | 27.04% | 14.59% | 14.80% |
| Solving the problems (S15)                                                                    | 17.96% | 16.41% | 27.00% | 22.24% | 29.04% | 25.19% | 14.63% | 15.83% |
| Orientation towards customers and results (S16)                                               | 20.04% | 20.48% | 34.12% | 28.21% | 36.05% | 28.93% | 19.14% | 20.75% |
| Critical thinking (S17)                                                                       | 17.53% | 18.45% | 31.62% | 23.85% | 31.17% | 25.23% | 18.45% | 19.39% |
| <b>Theoretical competences:</b>                                                               |        |        |        |        |        |        |        |        |
| Knowledge of economic theoretical concepts and formation of an economic way of thinking (S18) | 19.47% | 21.69% | 19.89% | 20.30% | 24.05% | 21.16% | 19.78% | 23.78% |
| Knowledge of professional terminology, theories and concepts (S19)                            | 22.00% | 21.86% | 21.42% | 20.81% | 23.48% | 21.30% | 18.88% | 23.64% |
| <b>Practical competences:</b>                                                                 |        |        |        |        |        |        |        |        |
| Applying in practice the theoretical concepts (S20)                                           | 20.57% | 18.08% | 29.28% | 25.24% | 33.09% | 26.53% | 19.65% | 17.59% |
| ICT skills (S21)                                                                              | 22.05% | 18.34% | 33.78% | 27.78% | 37.09% | 27.21% | 19.49% | 18.96% |
| Applying the mathematics theories to manage                                                   | 28.43% | 31.83% | 31.92% | 30.38% | 31.26% | 30.45% | 26.26% | 33.98% |

|                                          |        |        |        |        |        |        |        |        |
|------------------------------------------|--------|--------|--------|--------|--------|--------|--------|--------|
| operational problems (S22)               |        |        |        |        |        |        |        |        |
| Understanding the business reality (S23) | 18.83% | 17.10% | 25.74% | 25.65% | 28.76% | 26.42% | 17.50% | 15.49% |

Note: coefficient of variance is calculated as standard deviation/ mean of the groups for each variable

Group 1= students 3<sup>rd</sup> year from BUES – IBE questionnaire applied November 2019- January 2020

Group 2= students 3<sup>rd</sup> year from BUES – IBE, questionnaire applied November 2021- January 2022

Source: Authors' based on SPSS output.

**Table S2.** Testing normality and homogeneity by group of variables (internationalization activities that contribute to the development of the skills for NATIONAL/INTERNATIONAL labor market) based on coefficient of variation of the two analyzed groups (CV)

| Internationalization activities in HEI                                                                                                                                         | University internationalization activities that contribute to the development of the skills for the NATIONAL labour market |         | University internationalization activities that contribute to the development of the skills for the INTERNATIONAL labour market |         |
|--------------------------------------------------------------------------------------------------------------------------------------------------------------------------------|----------------------------------------------------------------------------------------------------------------------------|---------|---------------------------------------------------------------------------------------------------------------------------------|---------|
|                                                                                                                                                                                | Group 1                                                                                                                    | Group 2 | Group 1                                                                                                                         | Group 2 |
| <b>I. Activities focused on internationalization of the curriculum:</b>                                                                                                        |                                                                                                                            |         |                                                                                                                                 |         |
| Intensive English courses/or subjects taught exclusively in English (IA1)                                                                                                      | 23.05%                                                                                                                     | 22.93%  | 21.62%                                                                                                                          | 22.02%  |
| Intensive courses in other foreign languages (as a second foreign language) /or subjects taught exclusively in other languages (IA2)                                           | 31.94%                                                                                                                     | 34.37%  | 29.33%                                                                                                                          | 32.10%  |
| Joint/dual diplomas from different countries according to universities collaborations (IA3)                                                                                    | 35.50%                                                                                                                     | 35.51%  | 33.93%                                                                                                                          | 35.17%  |
| International topic of the courses/ or providing international professions for the students (IA4)                                                                              | 27.34%                                                                                                                     | 22.34%  | 24.91%                                                                                                                          | 23.37%  |
| Compulsory subjects that are studied in institutions outside the country according to universities collaborations (IA5)                                                        | 29.06%                                                                                                                     | 34.93%  | 30.22%                                                                                                                          | 31.19%  |
| The diploma offers internationally recognized professional qualifications (IA6)                                                                                                | 24.27%                                                                                                                     | 24.15%  | 26.94%                                                                                                                          | 25.33%  |
| <b>II. Internationalization through extracurricular activities or projects/ collaborations of HEI with different stakeholders belonging to local and international groups:</b> |                                                                                                                            |         |                                                                                                                                 |         |
| Extracurricular activities promoted by the HEI (IA7)                                                                                                                           | 28.07%                                                                                                                     | 29.72%  | 29.45%                                                                                                                          | 27.56%  |
| <b>III. Activities focused on cross-border education:</b>                                                                                                                      |                                                                                                                            |         |                                                                                                                                 |         |
| Study programs mobility/ double or joint specialization (IA8)                                                                                                                  | 33.03%                                                                                                                     | 28.93%  | 32.17%                                                                                                                          | 30.43%  |
| Student mobility (IA9)                                                                                                                                                         | 23.84%                                                                                                                     | 24.53%  | 24.56%                                                                                                                          | 24.87%  |
| Professors and staff mobility (IA10)                                                                                                                                           | 33.63%                                                                                                                     | 29.16%  | 31.95%                                                                                                                          | 29.26%  |
| Other cross border activities like collaboration with international students, professors, researchers to develop transnational programs                                        | 30.90%                                                                                                                     | 28.93%  | 30.62%                                                                                                                          | 27.41%  |

|                                                                                  |  |  |  |  |
|----------------------------------------------------------------------------------|--|--|--|--|
| or transnational internships in order to provide competences for students (IA11) |  |  |  |  |
|----------------------------------------------------------------------------------|--|--|--|--|

Note: coefficient of variance (CV) is calculated as standard deviation/ mean of the groups for each variable

Group 1= students 3<sup>rd</sup> year from IBE faculty, survey conducted in November 2019- January 2020

Group 2= students 3<sup>rd</sup> year from IBE faculty, survey conducted in November 2021- January 2022

Source: Authors' based on SPSS output.
